# Supplementary material
Source: publisher figshare collection journal article supplement (https://karger.figshare.com/articles/dataset/_/6445094)
Supplement: Supplementary file 1 [file 1 › BRC487073_sm_Suppl._Material.pdf]

**Systematic Review**

---

# Effects of Music Intervention on the Physical and Mental Status of Patients with Breast Cancer: A Systematic Review and Meta-Analysis

Xia Wang<sup>a</sup> Yin Zhang<sup>a</sup> Yao Fan<sup>b,c,d</sup> Xiangsheng Tan<sup>e</sup> Xun Lei<sup>b,c,d</sup>

<sup>a</sup>School of Pediatrics, Chongqing Medical University, Chongqing, China; <sup>b</sup>School of Public Health and Management, Chongqing Medical University, Chongqing, China; <sup>c</sup>Research Center for Medicine and Social Development, Chongqing Medical University, Chongqing, China; <sup>d</sup>Collaborative Innovation Center of Social Risks Governance in Health, Chongqing Medical University, Chongqing, China; <sup>e</sup>Fifth Clinical College, Chongqing Medical University, Chongqing, China

**Supplementary Table 1.** Characteristics of study

| Author(s)              | Sample Size |    |     | Music intervention                                            |                                    |                               |                        |                      | Psychological outcomes          | Physiological outcomes | Other outcomes |
|------------------------|-------------|----|-----|---------------------------------------------------------------|------------------------------------|-------------------------------|------------------------|----------------------|---------------------------------|------------------------|----------------|
|                        | total       | ex | con | Method                                                        | Length of sessions                 | Duration of treatment         | Music selections       | Timing               |                                 |                        |                |
| Zhou 2009 [3]          | 60          | 30 | 30  | Music listening +music imagery+ progressive muscle relaxation | 30 minutes per time, twice per day | 9 weeks                       | Patients + researchers | During chemotherapy  | Anxiety (SAS), depression (SDS) | -                      | -              |
| Zheng et al. 2015 [10] | 70          | 35 | 35  | Music listening                                               | 30 minutes per time, twice per day | Until discharge from hospital | Patients               | After mastectomy     | -                               | Pain(VAS)              | -              |
| Zhang et al. 2016 [24] | 50          | 25 | 25  | Music listening                                               | 60 min per time, twice per day     | 7 days                        | Patients+ researchers  | During chemotherapy  | -                               | Nausea and vomiting    | -              |
| Yao et al. 2015 [25]   | 60          | 30 | 30  | Music listening                                               | 30 min per time, twice per day     | 3 days                        | Researchers            | During chemotherapy  | -                               | Nausea and vomiting    | -              |
| Yang et al. 2013 [4]   | 30          | 15 | 15  | Music listening                                               | 20 min per time, twice per day     | 3 months                      | Researchers            | During chemotherapy  | Depression (SDS)                | -                      | -              |
| Xu et al. 2010 [33]    | 108         | 58 | 50  | Music listening                                               | The whole process of operation     | -                             | Patients + researchers | During the operation | -                               | SBP,DBP,HR             | -              |

| Author(s)             | Sample Size |    |    | Music intervention                                            |                                                       |                                   |                        |                      | Psychological outcomes          | Physiological outcomes | Other outcomes |
|-----------------------|-------------|----|----|---------------------------------------------------------------|-------------------------------------------------------|-----------------------------------|------------------------|----------------------|---------------------------------|------------------------|----------------|
|                       | total       | ex | co | Method                                                        | Length of sessions                                    | Duration of treatment             | Music selections       | Timing               |                                 |                        |                |
| Xie et al. 2006 [26]  | 70          | 35 | 35 | Music listening                                               | 120 min per time, 1-3 times per day                   | The whole process of chemotherapy | Patients + researchers | During chemotherapy  | -                               | Vomiting               | -              |
| Wu 2009 [32]          | 68          | 32 | 36 | Music listening                                               | The whole process of operation                        | -                                 | Patients + researchers | During the operation | -                               | SBP,DBP,HR,R R         | -              |
| Wu et al. 2014 [19]   | 90          | 45 | 45 | Music listening                                               | 30 min before the operation                           | -                                 | Patients + researchers | During the operation | Anxiety (SAS)                   | SBP,DBP,HR             | -              |
| Wang 2009 [27]        | 100         | 50 | 50 | Music listening                                               | 60 min during chemotherapy and 30 min before sleeping | 3 days                            | Patients + researchers | During chemotherapy  | -                               | Nausea and vomiting    | -              |
| Wang et al. 2011 [28] | 84          | 46 | 38 | Music listening                                               | 60 min during chemotherapy and 30 min before sleeping | 4 days                            | Patients + researchers | During chemotherapy  | -                               | Nausea and vomiting    | -              |
| Sun et al. 2013 [5]   | 60          | 30 | 30 | Music listening +music imagery+ progressive muscle relaxation | 30 min per time, once per day                         | 2 days                            | Patients + researchers | During chemotherapy  | Anxiety (SAS), depression (SDS) | -                      | -              |

| Author(s)              | Sample Size |     |     | Music intervention                                            |                                |                                   |                        |                      | Psychological outcomes | Physiological outcomes       | Other outcomes              |
|------------------------|-------------|-----|-----|---------------------------------------------------------------|--------------------------------|-----------------------------------|------------------------|----------------------|------------------------|------------------------------|-----------------------------|
|                        | total       | ex  | con | Method                                                        | Length of sessions             | Duration of treatment             | Music selections       | Timing               |                        |                              |                             |
| Ren et al. 2010 [6]    | 60          | 30  | 30  | Music listening                                               | At least 30 min per day        | 9 weeks                           | Patients + researchers | During chemotherapy  | Depression (SDS)       | -                            | -                           |
| Pan et al. 2015 [29]   | 50          | 25  | 25  | Music listening                                               | 60 min per time, twice per day | Until 1-7 days after chemotherapy | Patients + researchers | During chemotherapy  | -                      | Nausea and vomiting          | -                           |
| Ma 2013 [30]           | 100         | 50  | 50  | Music listening                                               | 30 min per time, twice per day | Until end of third chemotherapy   | Patients + researchers | During chemotherapy  | Anxiety (Hamilton)     | Nausea and vomiting          | -                           |
| Lv et al. 2008 [34]    | 80          | 40  | 40  | Music listening                                               | 30 min before operation        | -                                 | Patients + researchers | Before operation     | Anxiety (SAI)          | SBP,DBP,HR,salivary cortisol | -                           |
| Lu et al. 2010 [37]    | 102         | 52  | 50  | Music listening +music imagery+ progressive muscle relaxation | 30 min per time, twice per day | 2 cycles of chemotherapy          | Researchers            | During chemotherapy  | Anxiety (SAI)          | -                            | Rotterdam symptom checklist |
| Liang et al. 2010 [23] | 310         | 158 | 152 | Music listening                                               | Unknown                        | Unknown                           | Patients + researchers | Perioperative period | Anxiety (SAI)          | -                            | -                           |

| Author(s)             | Sample Size |    |    | Music intervention                                            |                                                       |                          |                        |                     | Psychological outcomes          | Physiological outcomes               | Other outcomes |
|-----------------------|-------------|----|----|---------------------------------------------------------------|-------------------------------------------------------|--------------------------|------------------------|---------------------|---------------------------------|--------------------------------------|----------------|
|                       | total       | ex | co | Method                                                        | Length of sessions                                    | Duration of treatment    | Music selections       | Timing              |                                 |                                      |                |
| Jin et al. 2008 [31]  | 100         | 50 | 50 | Music listening                                               | 60 min during chemotherapy and 30 min before sleeping | 3 days                   | Patients + researchers | During chemotherapy | Anxiety (Hamilton)              | Nausea and vomiting                  | -              |
| Huang 2012 [7]        | 60          | 30 | 30 | Music listening +music imagery+ progressive muscle relaxation | At least 30 min per time, twice per day               | 9 weeks                  | Patients + researchers | During chemotherapy | Depression (SDS)                | -                                    | -              |
| Gu 2015 [11]          | 80          | 40 | 40 | Music listening                                               | Unknown                                               | Unknown                  | Researchers            | During PICC         | Anxiety (SAS)                   | Pain (Changhai Pain Measuring Scale) | -              |
| Fu et al. 2009 [8]    | 78          | 40 | 38 | Music listening +music imagery+ progressive muscle relaxation | 40-60 min per time, twice per day                     | 4 cycles of chemotherapy | Patients + researchers | During chemotherapy | Anxiety (SAS), depression (SDS) | -                                    | -              |
| Chen et al. 2002 [39] | 128         | 62 | 66 | Music listening +music imagery                                | 60 min per time, twice per day                        | 18 weeks                 | Patients + researchers | During chemotherapy | -                               | -                                    | QLQ-CCC,KPS    |

| Author(s)             | Sample Size |    |    | Music intervention             |                                |                                                        |                        |                     | Psychological outcomes | Physiological outcomes | Other outcomes                              |
|-----------------------|-------------|----|----|--------------------------------|--------------------------------|--------------------------------------------------------|------------------------|---------------------|------------------------|------------------------|---------------------------------------------|
|                       | total       | ex | co | Method                         | Length of sessions             | Duration of treatment                                  | Music selections       | Timing              |                        |                        |                                             |
| Chen et al. 2004 [38] | 86          | 42 | 44 | Music listening +music imagery | 60 min per time, twice per day | 18 weeks                                               | Patients + researchers | During chemotherapy | -                      | -                      | CD3, CD4, CD8, CD4/CD8, activity of NK cell |
| Zhou et al. 2011 [9]  | 105         | 54 | 51 | Music listening                | 30 min per time, twice per day | Postoperative hospitalization + 2 chemotherapy periods | Patients + researchers | During chemotherapy | Depression (SDS)       | -                      | Duration of hospital stay                   |
| Zhou et al. 2012 [17] | 105         | 54 | 51 | Music listening                | 30 min per time, twice per day | Postoperative hospitalization + 2 chemotherapy periods | Patients + researchers | During chemotherapy | Anxiety (SAS)          | -                      | -                                           |
| Zhou et al. 2011 [12] | 105         | 54 | 51 | Music listening                | 30 min per time, twice per day | Postoperative hospitalization + 2 chemotherapy periods | Patients + researchers | During chemotherapy | -                      | Pain (PRI,PPI,VAS)     | -                                           |

| Author(s)                     | Sample Size |    |    | Music intervention |                    |                       |                  |                                     | Psychological outcomes | Physiological outcomes | Other outcomes |
|-------------------------------|-------------|----|----|--------------------|--------------------|-----------------------|------------------|-------------------------------------|------------------------|------------------------|----------------|
|                               | total       | ex | co | Method             | Length of sessions | Duration of treatment | Music selections | Timing                              |                        |                        |                |
| Binns-Turner et al. 2011 [13] | 30          | 15 | 15 | Music listening    | 4 hours            | Perioperative period  | Patients         | Perioperative period                | Anxiety (SAI)          | Pain (VAS),MAP, HR     | -              |
| Bulfone et al. 2009 [40]      | 60          | 30 | 30 | Music listening    | 15 mins            | -                     | Patients         | Before chemotherapy                 | Anxiety( SAI)          | -                      | -              |
| Hanser et al. 2006 [14]       | 70          | 35 | 35 | Music listening    | 45 mins per time   | 3 sessions            | Not mentioned    | During chemotherapy/other treatment | Depression (HADS)      | Pain ( VAS),HR         | FACT           |

Note: SAS= Self-Rating Anxiety Scale; SDS=Self-rating Depression Scale; VAS=Visual Analogue Scale; SBP=Systolic blood pressure; DBP=diastolic blood pressure; HR=heart rate; RR=respiratory rate; SAI=State Anxiety Inventory; PRI=Pain Rating Index; PPI=Present Pain Intensity; MAP=mean arterial pressure; FACT=Functional Assessment of Chronic Illness Therapy; HADS=Hospital Anxiety and Depression Scale. OLQ-CCC=Quality of Life Questionnaire for Chinese Cancer patients receiving Chemobiotherapy; KPS= Karnofsky performance status.
